# Supplementary material
Source: HighWire-hosted journal article supplement (https://bmjopenquality.bmj.com/content/9/1/e000833)
Supplement: inline-supplementary-material-5 [file inline-supplementary-material-5.pdf]

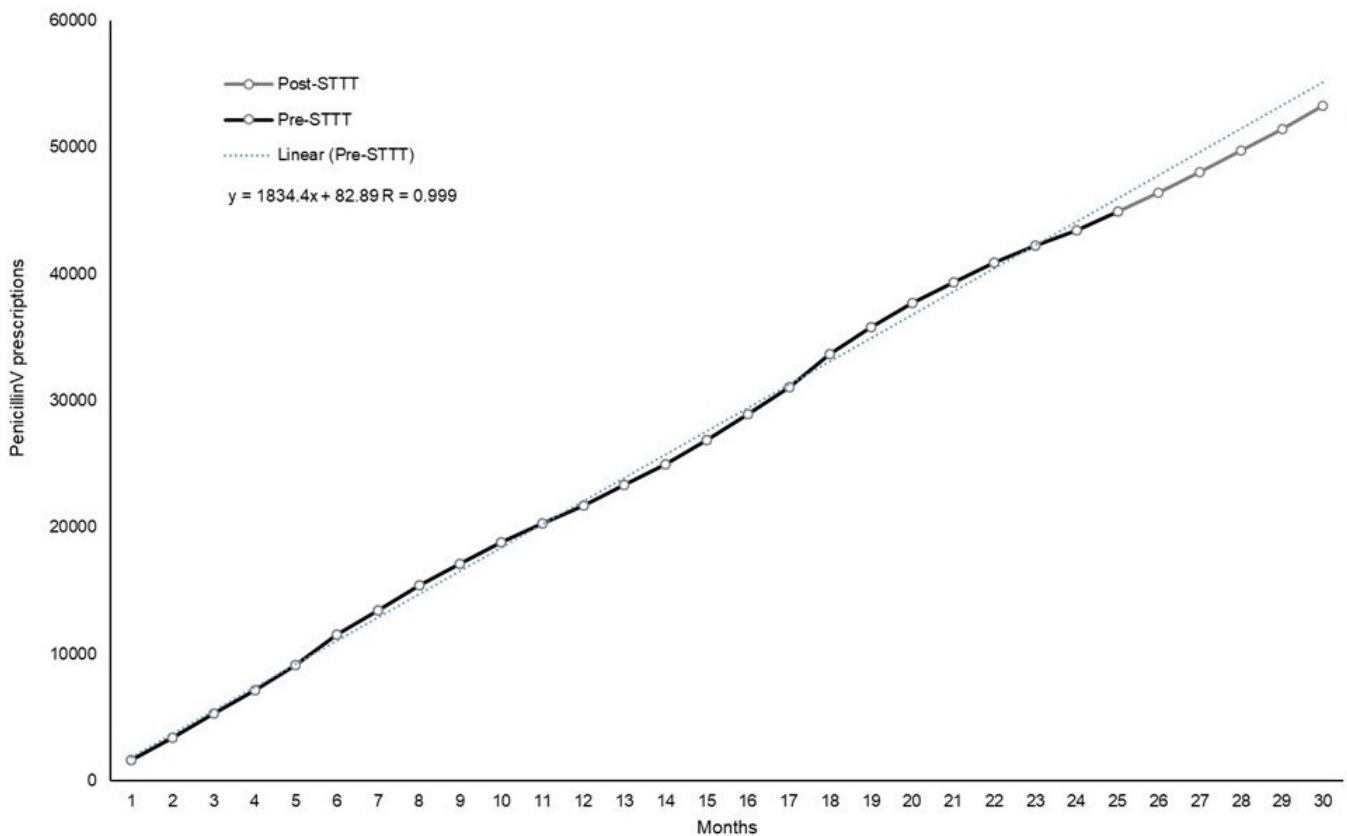

**Supplementary Figure 3:** The linear regression used to generate a cumulative supply equation for phenoxymethylpenicillin prescriptions ( $r = 0.999$ ,  $p < 0.005$ ) in clusters without pharmacies piloting the Sore Throat Test and Treat (STTT) service (non-STTT clusters), with data from October 2016 (month 1). The graph includes predicted and actual prescriptions for phenoxymethylpenicillin pre- (months 1 to 25) and post- (months 26 to 30) STTT intervention
